# Supplementary material
Source: PubMed Central journal article supplement (PMC1167539)
Supplement: plntcell_tpc.105.032961_1.pdf [file plntcell_tpc.105.032961_1.pdf]

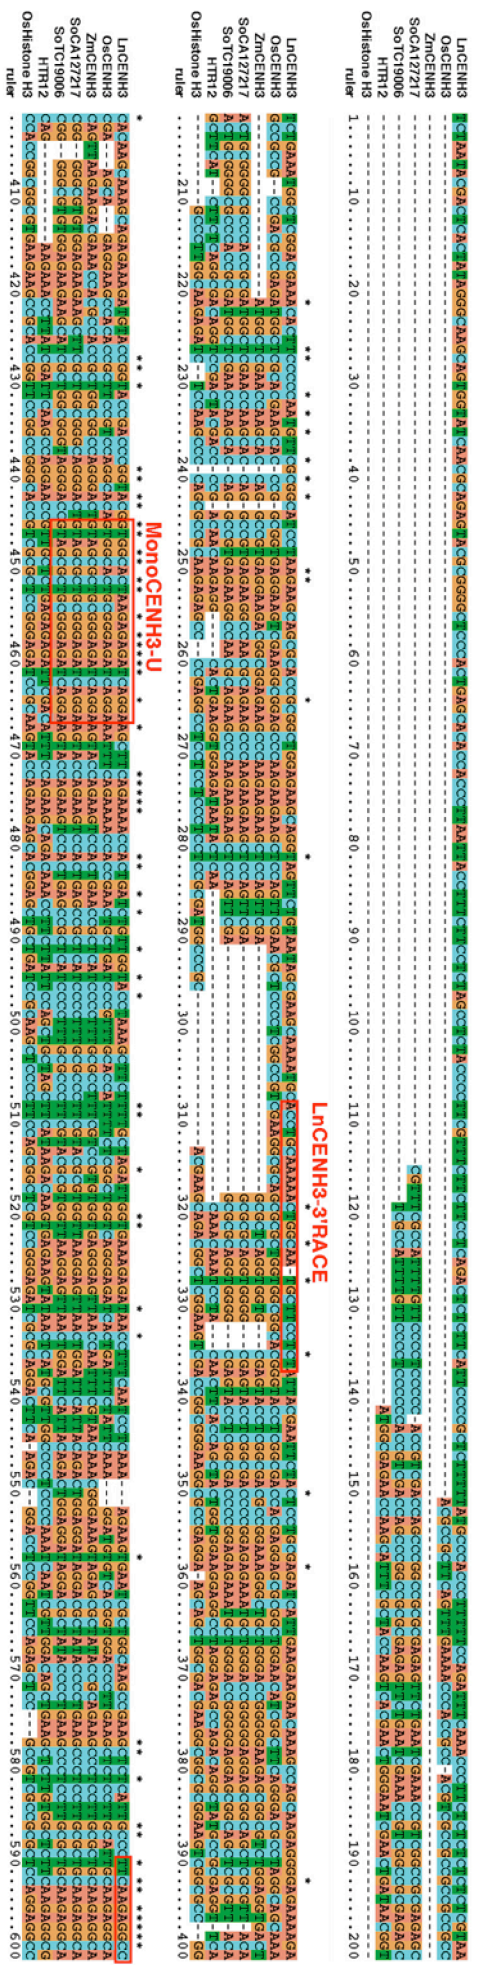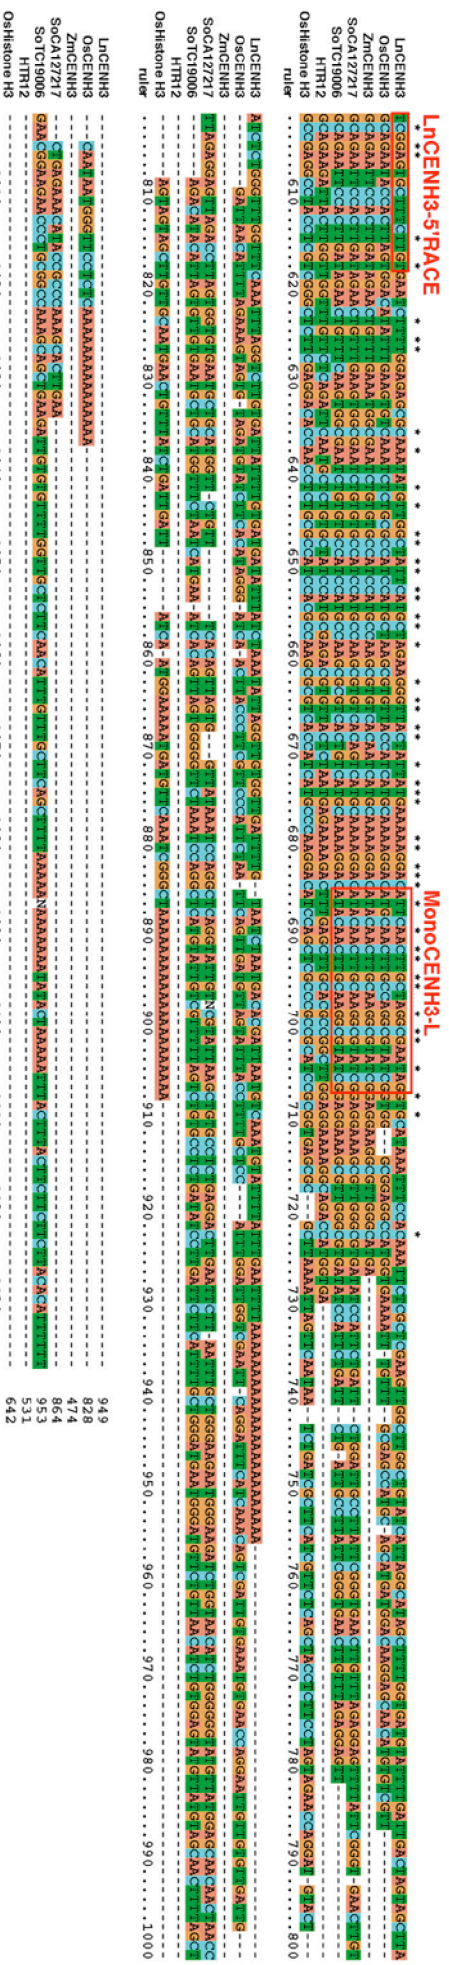

**Supplemental Figure 1** cDNA sequence alignment of LncENH3 and CENH3s from other plant species and canonical histone H3 from rice. Conserved nucleotide positions are indicated by asterisks above the nucleotides. Red boxes indicate the primer regions used in this study.
