# Supplementary material
Source: PubMed Central journal article supplement (PMC1167539)

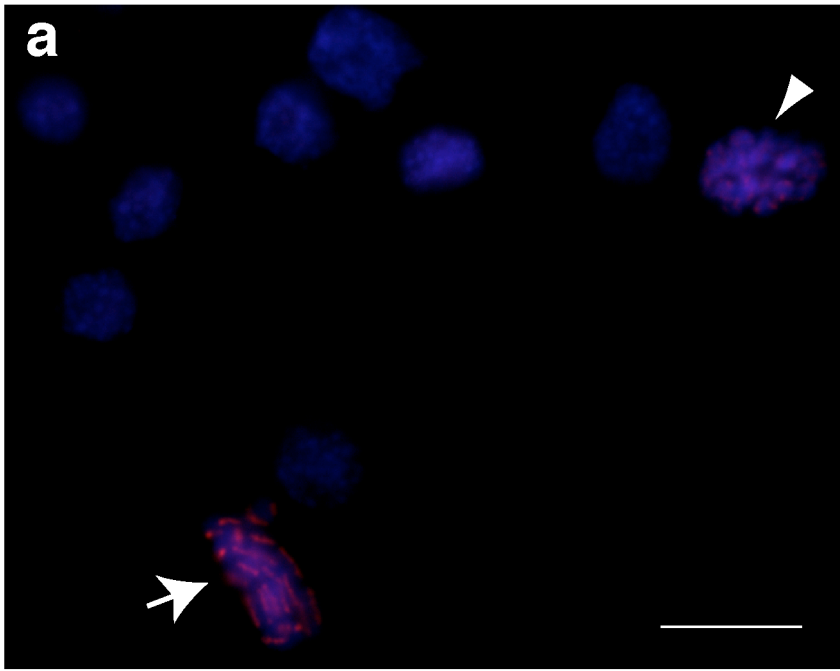

**Figure S2 Immunostaining of *L. nivea* using anti-LnCENH3 antibodies.**

(a) Low-magnification microscopic view containing metaphase (arrow), prophase (arrowhead) and interphase cells. LnCENH3 immunosignals and DAPI-stained *L. nivea* chromosomes are visualized as red and blue, respectively. (c, f, i and l) LnCENH3 immunosignals, (b, e, h and k) DAPI-stained *L. nivea* metaphase chromosomes, and (d, g, j and m) merged images of b and c, e and f, h and i, and k and m, respectively. Arrows in h-m indicate chromosomes viewed end-on from the telomere. Bar, 5  $\mu$ m.

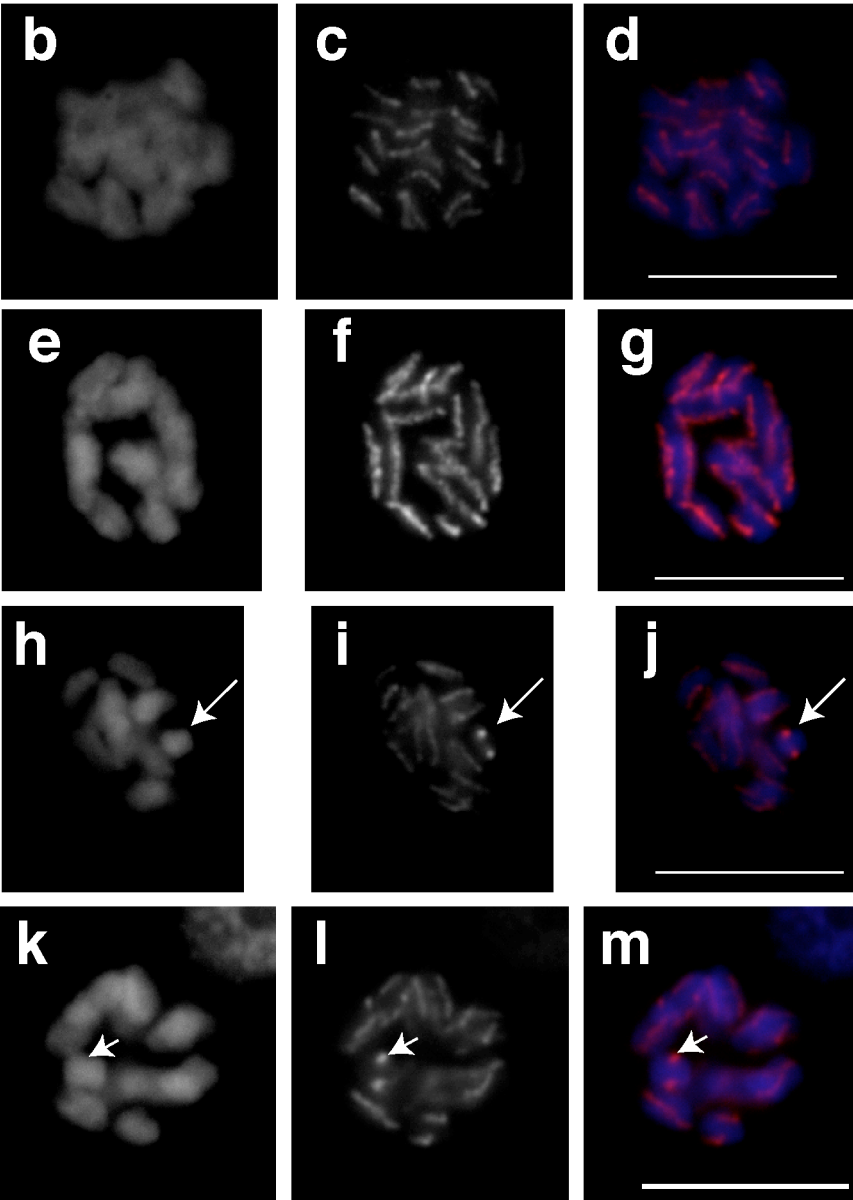

Supplement: plntcell_tpc.105.032961_2.pdf [file plntcell_tpc.105.032961_2.pdf]
